# Supplementary material for: Pro-Apoptotic and Anti-Invasive Properties Underscore the Tumor-Suppressing Impact of Myoglobin on a Subset of Human Breast Cancer Cells
Source: MDPI journal article supplement (doi:10.3390/ijms231911483), 2022-09-29
Supplement: s1 [file s1]

## Supplementary Figures

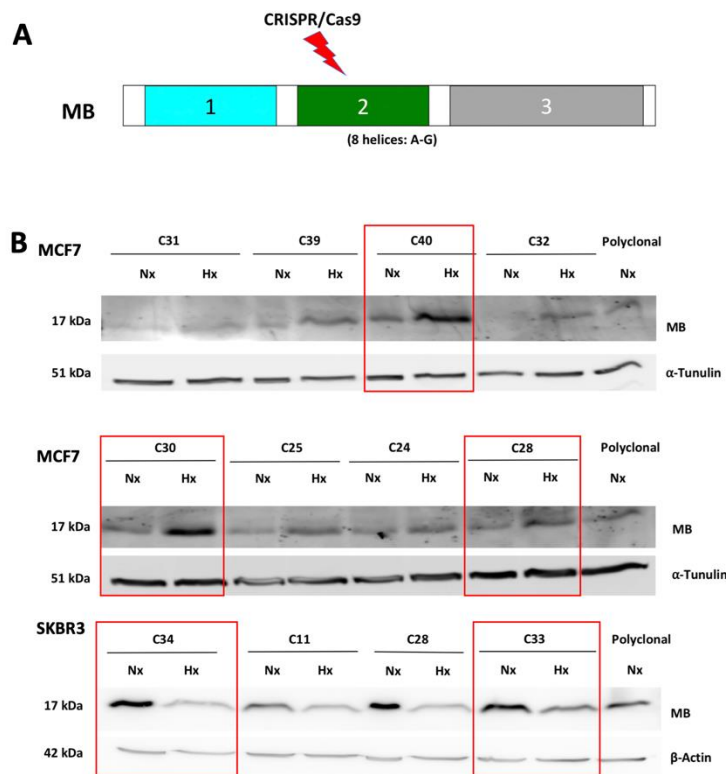

### Supplemental Figure S1. Generation of MB knockout clones from MCF7 and SKBR3 cells

**(A)** Representation of human *MB* gene composed of 3 exons. Exon 2 was targeted to knockout the gene by CRISPR/Cas9 to obtain loss of function. **(B)** Representative Western blot to examine basal MB expression at normoxia (Nx) and (Hx, 0.2% O<sub>2</sub>) in different monoclonal cell lines (denoted as C: clone and number) produced from the paternal MCF7 or SKBR3.

**A**

|                                                                                                                                                                                                                                                                                                                                                                                  |  |
|----------------------------------------------------------------------------------------------------------------------------------------------------------------------------------------------------------------------------------------------------------------------------------------------------------------------------------------------------------------------------------|--|
| <b>WT human MB exon 2 DNA sequence</b><br>5'..GCTCTTTAAGGGTCACCCAGAGACTCTGGAGAAGTTTGACAAGTTCAAGCACCTGAAGTCAGAGGACGAGATGAAGGCGTCTGAGGACTTAAAGAAGCATGGTGCCACCGTCTACCCGCCCTGGGTGGCATCTTAAGAAGAAGGGGCATCATGAGGCAGAGATTAAGCCCCCTGGCACAGTCGCATGCCACCAAGCACAAGATCCCCGTGAAGTACCT..3'                                                                                                     |  |
| <b>MB exon 2 DNA sequence of MCF7 MBko</b><br><b>Modified Allele 1</b><br>5'..GCTCTTTAAGGGTCACCCAGAGACTCTGGAGAAGTTTGACAAGTTCAAGCACCTGAAGTCAGAGGACGAGATGAAGGCATATCTGAGGACTTAAAGAAGCATGGTGCCACTGTGCTACCCGCCCTGGGTGGCATCTTAAGAAGAAGGGGCATCATGAGGCAGAGATTAAGCCCCCTGGCACAGTCGCATGCCACCAAGCACAAGATCCCCGTGAAGTACCT..3' <b>1bp change/+2bp insertion= +2bp TAA: premature stop codon</b> |  |
| <b>Modified Allele 2</b><br>5'..GCTCTTTAAGGGTCACCCAGAGACTCTGGAGAAGTTTGACAAGTTCAAGCACCTGAAGTCAGAGGACGAGATGAAGGCATGACTTAAAGAAGCATGGTGCCACTGTGCTACCCGCCCTGGGTGGCATCTTAAGAAGAAGGGGCATCATGAGGCAGAGATTAAGCCCCCTGGCACAGTCGCATGCCACCAAGCACAAGATCCCCGTGAAGTACCT..3' <b>1bp change/-5bp deletion= -5bp TGA: premature stop codon</b>                                                       |  |
| <b>WT human MB protein sequence</b><br>MGLSDGEWQLVNVWGKVEADIPGHGQEVLRIRLFKGGHPETLEKFDKFKHLKSEDEMKASEDLKKGATVLTALGGILKKKHGHEAEIKPLAQSGATKHKIPVKYLEFISECIQVLQSKHPGDFGADAQAGAMNKALELFRKDMASNYKELGFQG<br>154 amino acids, exon 2, proximal and distal histidines                                                                                                                     |  |
| <b>MB protein sequence of MCF7 MBko</b><br><b>Modified allele 1</b><br>MGLSDGEWQLVNVWGKVEADIPGHGQEVLRIRLFKGGHPETLEKFDKFKHLKSEDEMKAYLR <b>truncated with lack of proximal and distal histidines → Loss of function</b>                                                                                                                                                            |  |
| <b>Modified allele 2</b><br>MGLSDGEWQLVNVWGKVEADIPGHGQEVLRIRLFKGGHPETLEKFDKFKHLKSEDEMK <b>truncated with lack of proximal and distal histidines → Loss of function</b>                                                                                                                                                                                                           |  |

**B**

|                                                                                                                                                                                                                                                                                                                                                                                                 |  |
|-------------------------------------------------------------------------------------------------------------------------------------------------------------------------------------------------------------------------------------------------------------------------------------------------------------------------------------------------------------------------------------------------|--|
| <b>MB exon 2 DNA sequence of SKBR3 MBko1</b><br><b>Modified Allele 1</b><br>5'..GCTCTTTAAGGGTCACCCAGAGACTCTGGAGAAGTTTGACAAGTTCAAGCACCTGAAGTCAGAGGACGAGATGAAGGCGTCTGAGGACTTAAAGAAGCATGGTGCGATGAAGGCATCTGAGGACTTAAAGAA GCATGGTCCGCCCTGGGTGGCATCTTAAGAAGAAGGGGCATCATGAGGCAGAGATTAAGCCCCCTGGCACAGTCGCATGCCACCAAGCACAAGATCCCCGTGAAGTACCT..3' <b>+14bp insertion= +14bp TGG: premature stop codon</b> |  |
| <b>Modified Allele 2</b><br>5'..CTCTTTAAGGGTCACCCAGAGACTCTGGAGAAGTTTGACAAGTTCAAGCACCTGAAGTCAGAGGACGAGATGAAGGCGTCTGAGGACTTAAAGAAGCATGGTGCCGCCCTGGGTGGCATCTTAAGAAGAAGGGCATCATGAGGCAGAGATTAAGCCCCCTGGCACAGTCGCATGCCACCAAGCACAAGATCCCCCTGAGTACCT..3' <b>-13bp insertion= -13bp TGA: premature stop codon</b>                                                                                        |  |
| <b>MB protein sequence of SKBR3 MBko1</b><br><b>Modified allele 1</b><br>MGLSDGEWQLVNVWGKVEADIPGHGQEVLRIRLFKGGHPETLEKFDKFKHLKSEDEMKASEDLKKG <b>truncated with lack of distal histidine → Loss of function</b>                                                                                                                                                                                   |  |
| <b>Modified allele 2</b><br>MGLSDGEWQLVNVWGKVEADIPGHGQEVLRIRLFKGGHPETLEKFDKFKHLKSEDEMKASEDLKKG <b>truncated with lack of distal histidine → Loss of function</b>                                                                                                                                                                                                                                |  |

**C**

|                                                                                                                                                                                                                                                                                                                                                                   |  |
|-------------------------------------------------------------------------------------------------------------------------------------------------------------------------------------------------------------------------------------------------------------------------------------------------------------------------------------------------------------------|--|
| <b>MB exon 2 DNA sequence of SKBR3 MBko2</b><br><b>Modified Allele 1</b><br>5'..CTCTTTAAGGGTCACCCAGAGACTCTGGAGAAGTTTGACAAGTTCAAGCACCTGAAGTCAGAGGACGAGATGAAGGCGTCTGAGGACTTAAAGAAGCATGGTGCTGTGCTACCCGCCCTGGGTGGCATCTTAAAGAAGAAGGGGCATCATGAGGCAGAGATTAAGCCCCCTGGCACAGTCGCATGCCACCAAGCACAAGATCCCCGTGAAGTACCT..3' <b>-2bp deletion= -2bp TAA: premature stop codon</b> |  |
| <b>Modified Allele 2</b><br>5'..CTCTTTAAGGGTCACCCAGAGACTCTGGAGAAGTTTGACAAGTTCAAGCACCTGAAGTCAGAGGACGAGATGAAGNANGNGCCNCTGNGCTACCCGCCCTGGGTGGCATCTTAAGAAGAAGGGGCATCATGAGGCAGAGATTAAGCCCCCTGGCACAGTCGCATGCCACCAAGCACAANATCCCNCTGAGTACCT..3' <b>-21bp insertion= -21bp</b>                                                                                             |  |
| <b>MB protein sequence of SKBR3 MBko2</b><br><b>Modified allele 1</b><br>MGLSDGEWQLVNVWGKVEADIPGHGQEVLRIRLFKGGHPETLEKFDKFKHLKSEDEMKASEDLKKG <b>truncated with lack of distal histidine → Loss of function</b>                                                                                                                                                     |  |
| <b>Modified allele 2</b><br><b>missense mutation, no protein is produced → Loss of function</b>                                                                                                                                                                                                                                                                   |  |

## Supplemental Figure S2. Sequencing of MCF7 and SKBR3 MB-knockout cells shows genomic alterations

(A) DNA and protein sequences of wildtype human *MB* exon 2, showing induced modification with resulting genetic alteration and loss of function proteins in MCF7 MB-KO cells. (B) and (C) the same as (A) but in SKBR3 MB-KO cells.

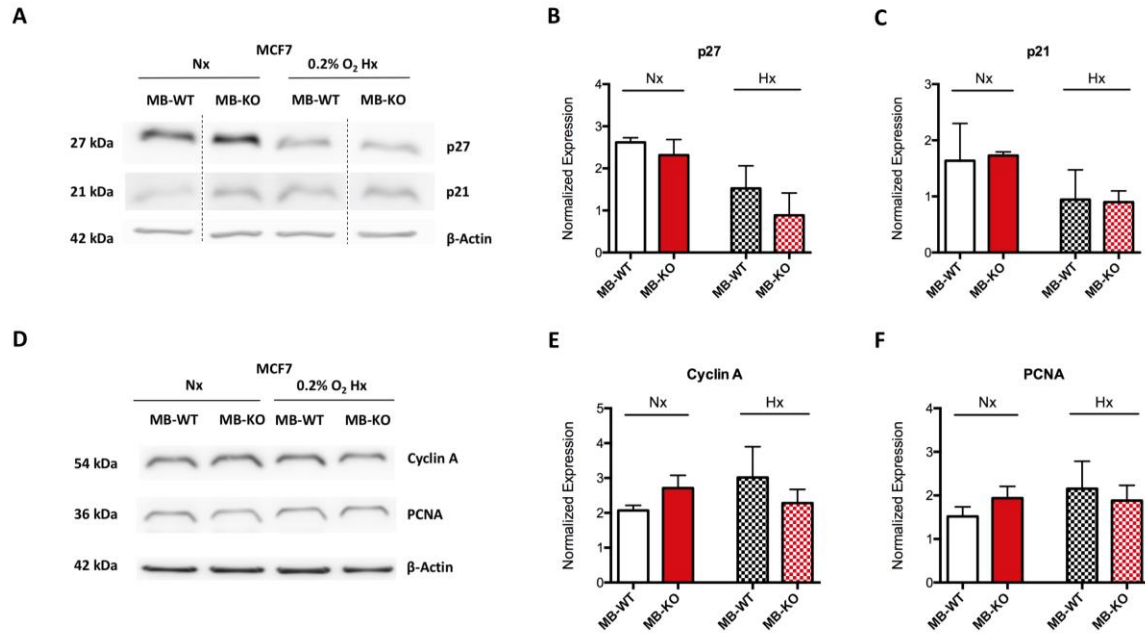

### Supplemental Figure S3. Myoglobin does not impact p27, p21, Cyclin A, and PCNA proteins expressions

(A) and (D) Representative Western Blotting image of whole tissue lysate of MB-WT and MB-KO clones of MCF7 cells cultured at normoxia Nx or 0.2% O<sub>2</sub> Hx for 72h and stained for (A) p27 (27 kDa), p21 (21 kDa) and β-actin (42 kDa) used as loading control or (D) Cyclin A (54 kDa), PCNA (36kDa) and β-actin (42 kDa) used as the loading control. Panels (B), (C), (E), and (F) Band intensity of p27, p21, cyclin A and PCNA proteins, respectively, after Western Blotting, from MB-WT (white) and MB-KO (red) cells of MCF7 at Nx (empty bars) and 0.2%O<sub>2</sub> Hx (dashed bars), was quantified using MCID Analysis 7.0 and normalized to β-actin (n=3). Data are shown as bar graph with mean and standard error of mean and analyzed by Student's t-test

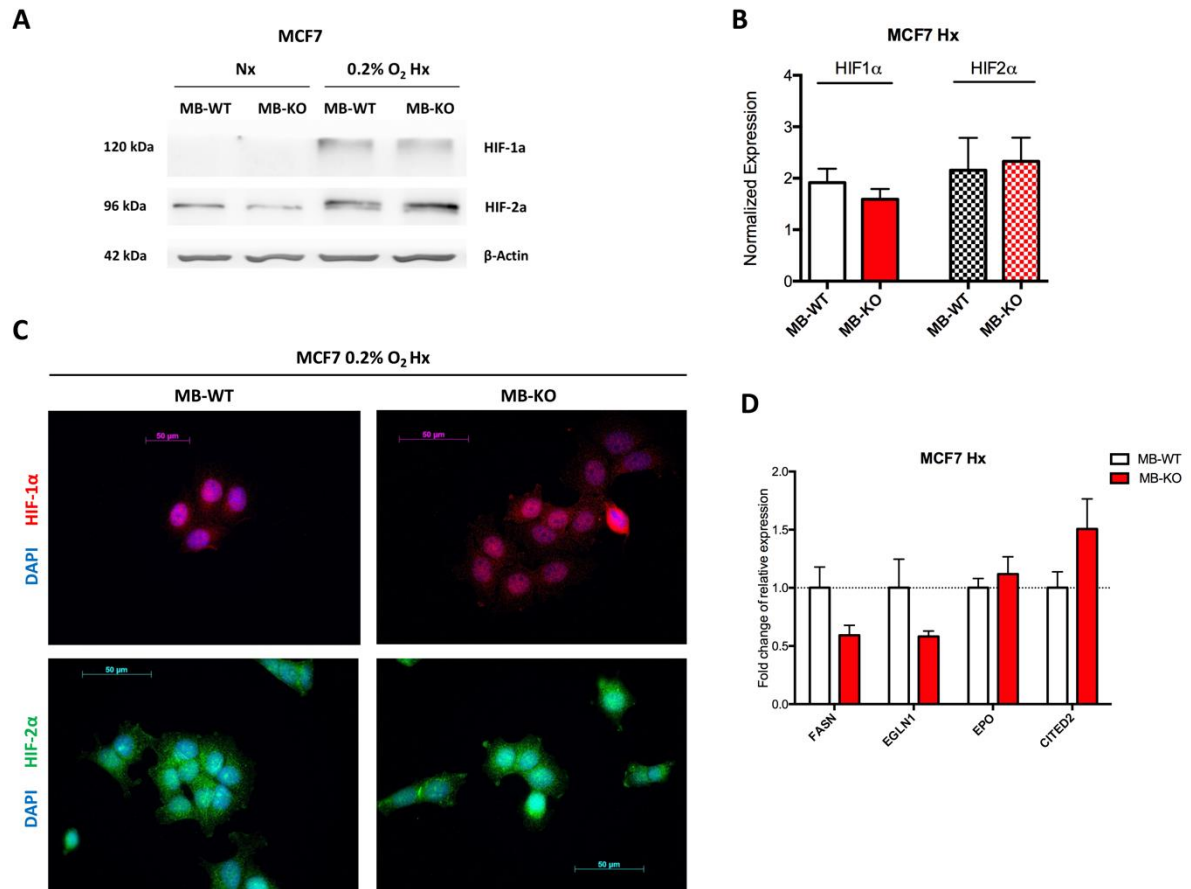

**Supplemental Figure S4. Endogenously expressed MB in BrCa cells has no impact on cellular response to hypoxia.**

(A) Representative Western Blotting image (n=3) of whole tissue lysate of MB-WT and MB-KO clones of MCF7 cells cultured at normoxia Nx or 0.2% O<sub>2</sub> Hx for 72h and stained for hypoxia-inducible factor-1α (HIF-1α) (120 kDa), hypoxia-inducible factor-2α (HIF-2α) (96 kDa) and β-actin (42 kDa) used as the loading control. (B) Band intensity of HIF-1α (empty bars) and HIF-2α (dashed bars) proteins after Western Blotting, from MB-WT (white) and MB-KO (red) cells at 0.2%O<sub>2</sub> Hx for 72h, was quantified using MCID Analysis 7.0 and normalized to β-actin (n=3). (C) Representative immunocytochemistry images of MB-WT and MB-KO MCF7 cells stained for HIF-1α (red), HIF-2α (green), and DAPI (blue) after culturing at 0.2% O<sub>2</sub> hypoxia for 72h. Scale bar is 50μm. (D) Relative mRNA expression levels of downstream target genes of hypoxia-inducible factors: *FASN*, *EGLN1*, *EPO*, and *CITED2*, quantified by qPCR and normalized to β-actin (*ACTB*) mRNA expression levels, from MB-WT and MB-KO clones of MCF7 cells cultured at 0.2% O<sub>2</sub> Hx, for 72h. (n=3 per group). Data are shown as bar graphs and are presented as mean and standard error of mean and analyzed by Student t-test \*\*\*p<0.001

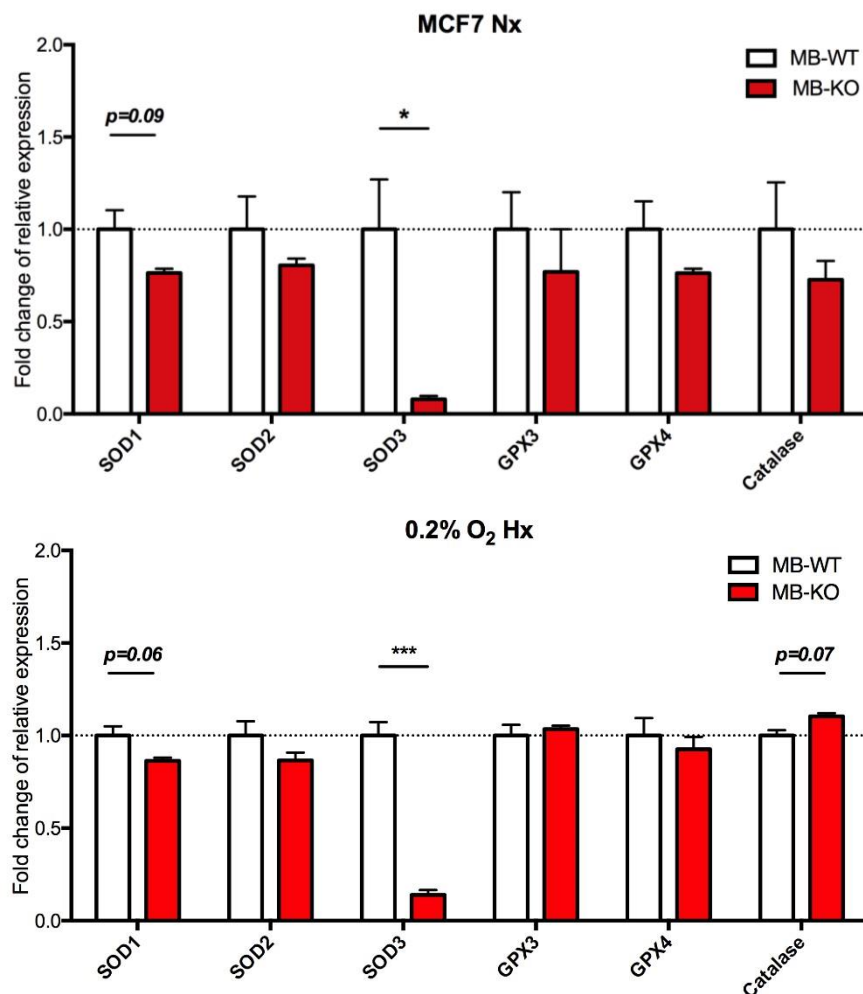

### Supplemental Figure S5. Loss of Myoglobin downregulates SOD3 antioxidant gene expression in breast cancer cells

Relative mRNA expression levels of antioxidant genes: superoxide dismutase 1-3 (*SOD1*, *SOD2*, *SOD3*) Glutathione peroxidase 3 and 4 (*GPX3*, *GPX4*), and Catalase, quantified by qPCR and normalized to  $\beta$ -actin (*ACTB*) mRNA expression levels, from MB-WT (white bars) and MB-KO (red bars) clones of MCF7 cells cultured at normoxia (upper panel) and 0.2% O<sub>2</sub> hypoxia (lower panel) for 72h (n=3 per group). Data are shown as bar graphs and are presented as mean and standard error of mean and analyzed by Student's t-test \* $p<0.05$

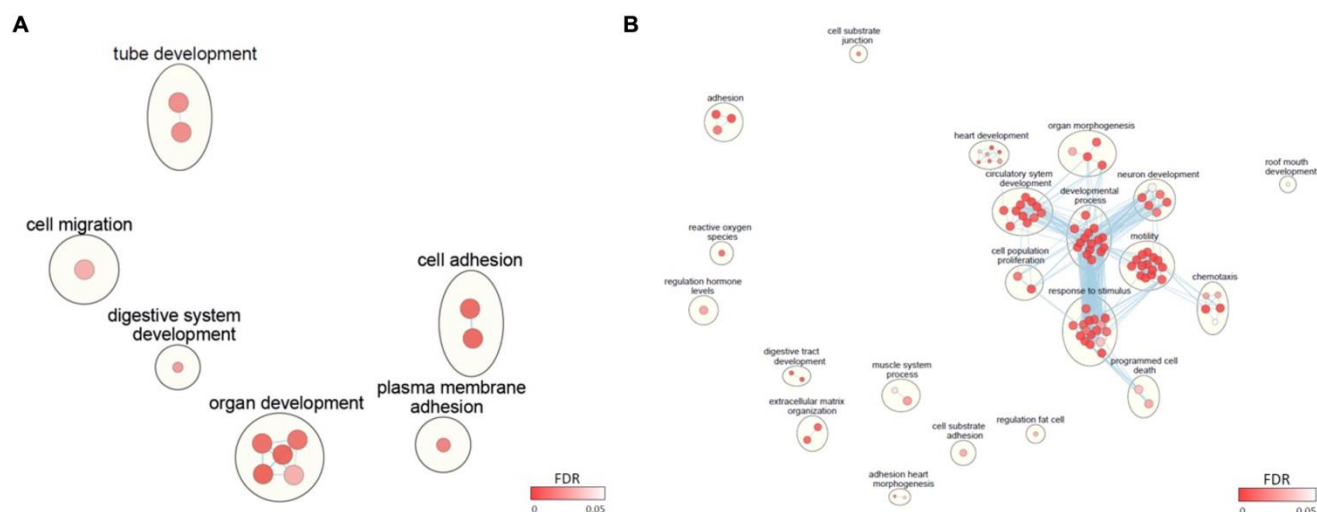

### Supplemental Figure S6. Enrichment maps for (A) normoxia and (B) hypoxia datasets

Each node represents a single GO-term. Blue lines are drawn between terms with a Jaccard-Index < 0.25. The FDR is represented by the node color. Annotations were created using AutoAnnotate and adjusted by hand. Clusters were arranged using CoSE algorithm, scaled and adjusted by hand.

### Supplementary Tables

**Supplementary table S1.** List of all altered genes for the normoxia dataset.

| Ensembl_ID      | GeneName | log2FoldChange | padj     |
|-----------------|----------|----------------|----------|
| ENSG00000136859 | ANGPTL2  | 6.497238777    | 8.29E-19 |
| ENSG00000085276 | MECOM    | 1.908155009    | 1.19E-16 |
| ENSG00000170689 | HOXB9    | 2.370505195    | 2.13E-14 |
| ENSG00000102271 | KLHL4    | 2.27965335     | 4.09E-14 |
| ENSG00000186583 | SPATC1   | -2.367750837   | 2.13E-11 |
| ENSG00000003436 | TFPI     | 1.877245487    | 2.13E-11 |
| ENSG00000254535 | PABPC4L  | 2.067369791    | 2.13E-11 |
| ENSG00000047634 | SCML1    | 2.108920653    | 2.13E-11 |
| ENSG00000204791 | SMPD5    | -2.450028613   | 3.42E-11 |
| ENSG00000147256 | ARHGAP36 | 2.010617272    | 1.84E-09 |
| ENSG00000111799 | COL12A1  | -1.514412518   | 8.15E-09 |
| ENSG00000254337 | -        | 1.186863904    | 2.37E-08 |
| ENSG00000170509 | HSD17B13 | 3.383238673    | 5.00E-08 |
| ENSG00000286322 | -        | 7.950572644    | 2.33E-07 |
| ENSG00000069020 | MAST4    | 1.166467697    | 2.93E-07 |
| ENSG00000116729 | WLS      | 2.472628126    | 8.19E-07 |
| ENSG00000099204 | ABLIM1   | 1.272415642    | 1.07E-06 |
| ENSG00000100867 | DHRS2    | -1.348192716   | 1.15E-06 |

|                 |          |              |             |
|-----------------|----------|--------------|-------------|
| ENSG00000205426 | KRT81    | -1.605372399 | 1.33E-06    |
| ENSG00000156463 | SH3RF2   | 1.30697382   | 1.58E-06    |
| ENSG00000115221 | ITGB6    | 1.179023437  | 2.10E-06    |
| ENSG00000165025 | SYK      | 0.816603319  | 2.19E-06    |
| ENSG00000177283 | FZD8     | 1.224943999  | 2.68E-06    |
| ENSG00000101986 | ABCD1    | -1.097831462 | 3.11E-06    |
| ENSG00000006747 | SCIN     | 1.468030029  | 3.72E-06    |
| ENSG00000204442 | FAM155A  | 1.436506374  | 5.09E-06    |
| ENSG00000142609 | CFAP74   | 1.169826068  | 5.59E-06    |
| ENSG00000164125 | GASK1B   | 1.202933479  | 5.96E-06    |
| ENSG00000164749 | HNF4G    | 2.461734879  | 5.96E-06    |
| ENSG00000169851 | PCDH7    | -1.282026173 | 6.53E-06    |
| ENSG00000138386 | NAB1     | 1.279430505  | 8.01E-06    |
| ENSG00000164649 | CDCA7L   | 0.852166284  | 9.64E-06    |
| ENSG00000078053 | AMPH     | 1.130350158  | 1.22E-05    |
| ENSG00000112246 | SIM1     | 2.237232903  | 2.13E-05    |
| ENSG00000230221 | -        | 5.245912348  | 2.38E-05    |
| ENSG00000090661 | CERS4    | -0.966670875 | 2.75E-05    |
| ENSG00000106688 | SLC1A1   | -1.096463336 | 4.56E-05    |
| ENSG00000164690 | SHH      | -0.783392357 | 4.56E-05    |
| ENSG00000084444 | FAM234B  | -0.82863806  | 4.65E-05    |
| ENSG00000168542 | COL3A1   | 1.785512546  | 4.65E-05    |
| ENSG00000196139 | AKR1C3   | 1.277371363  | 4.97E-05    |
| ENSG00000140465 | CYP1A1   | -1.799779936 | 5.61E-05    |
| ENSG00000216740 | ANXA2P3  | 4.807368885  | 8.17E-05    |
| ENSG00000235524 | MTCO1P23 | 5.734933587  | 9.14E-05    |
| ENSG00000169403 | PTAFR    | -1.204234084 | 9.25E-05    |
| ENSG00000172575 | RASGRP1  | 0.896350457  | 0.000121639 |
| ENSG00000144366 | GULP1    | 1.219525523  | 0.000133636 |
| ENSG00000242100 | RPL9P32  | 4.008219705  | 0.000148665 |
| ENSG00000105388 | CEACAM5  | 1.310571185  | 0.000177306 |
| ENSG00000249264 | EEF1A1P9 | 2.398701091  | 0.000177306 |
| ENSG00000219747 | RPL32P16 | 3.985066689  | 0.000192152 |
| ENSG00000244192 | -        | 4.016477241  | 0.000207848 |
| ENSG00000019549 | SNAI2    | 1.914653463  | 0.000230149 |
| ENSG00000174473 | GALNTL6  | -1.056506923 | 0.000230266 |
| ENSG00000135111 | TBX3     | 1.579923431  | 0.000246576 |
| ENSG00000242353 | RPL12P30 | 4.488389205  | 0.000303016 |
| ENSG00000177728 | TMEM94   | -1.172667797 | 0.000339375 |
| ENSG00000260290 | -        | 2.938784122  | 0.000339375 |
| ENSG00000177707 | NECTIN3  | 1.088425619  | 0.000386683 |
| ENSG00000145819 | ARHGAP26 | 0.806239319  | 0.000438049 |
| ENSG00000218426 | -        | 3.952504531  | 0.000438049 |
| ENSG00000236570 | RAD23BP1 | 4.668381483  | 0.000438049 |
| ENSG00000146674 | IGFBP3   | 1.103187633  | 0.000456235 |

|                 |           |              |             |
|-----------------|-----------|--------------|-------------|
| ENSG00000224897 | POT1-AS1  | 1.32339549   | 0.000471726 |
| ENSG00000110934 | BIN2      | 2.175411642  | 0.000486887 |
| ENSG00000198189 | HSD17B11  | 1.364153758  | 0.000529167 |
| ENSG00000235962 | RPL7AP53  | 3.518718481  | 0.000533354 |
| ENSG00000250241 | -         | 1.091674409  | 0.000560154 |
| ENSG00000099994 | SUSD2     | -1.083682308 | 0.000605718 |
| ENSG00000196932 | TMEM26    | 1.514357332  | 0.000605718 |
| ENSG00000221923 | ZNF880    | 1.313214424  | 0.000628899 |
| ENSG00000152661 | GJA1      | -1.396003408 | 0.000684844 |
| ENSG00000115590 | IL1R2     | 2.302150766  | 0.000684844 |
| ENSG00000211689 | TRGC1     | -1.589460016 | 0.000719756 |
| ENSG00000198363 | ASPH      | 0.990306265  | 0.00073226  |
| ENSG00000085831 | TTC39A    | -0.643551654 | 0.000735714 |
| ENSG00000130700 | GATA5     | 3.662812649  | 0.000735714 |
| ENSG00000138650 | PCDH10    | 0.707766674  | 0.000760099 |
| ENSG00000130827 | PLXNA3    | -0.880510779 | 0.000760418 |
| ENSG00000253506 | NACA2     | 3.230536532  | 0.000775503 |
| ENSG00000139793 | MBNL2     | 0.791411677  | 0.00078536  |
| ENSG00000218283 | MORF4L1P1 | 2.186681861  | 0.00078536  |
| ENSG00000226396 | -         | 2.586801472  | 0.00078536  |
| ENSG00000147689 | FAM83A    | -1.052500264 | 0.00079754  |
| ENSG00000182575 | NXPH3     | -0.881844501 | 0.00079754  |
| ENSG00000250148 | KRT8P31   | 3.137297838  | 0.00079754  |
| ENSG00000167925 | GHDC      | -1.122806256 | 0.000806164 |
| ENSG00000152137 | HSPB8     | -0.919015119 | 0.000843577 |
| ENSG00000183049 | CAMK1D    | 0.869017519  | 0.000862106 |
| ENSG00000105971 | CAV2      | 1.455190949  | 0.000876284 |
| ENSG00000144824 | PHLDB2    | 1.356770507  | 0.000881501 |
| ENSG00000189212 | DPY19L2P1 | 1.863555495  | 0.000890374 |
| ENSG00000223803 | RPS20P14  | 4.192687179  | 0.000922288 |
| ENSG00000188460 | ACTBP11   | 3.113010507  | 0.00105501  |
| ENSG00000250859 | HNRNPKP1  | 2.552120777  | 0.001265679 |
| ENSG00000143341 | HMCN1     | 0.928470086  | 0.001314871 |
| ENSG00000228499 | TMSB10P1  | 4.757400682  | 0.001345375 |
| ENSG00000180764 | PIPSL     | 2.729762359  | 0.001390165 |
| ENSG00000233668 | -         | 3.289256155  | 0.001390165 |
| ENSG00000179862 | CITED4    | -1.256261148 | 0.001407471 |
| ENSG00000204253 | HNRNPCP2  | 3.046251339  | 0.001407471 |
| ENSG00000108018 | SORCS1    | -1.481608293 | 0.001437959 |
| ENSG00000115641 | FHL2      | -0.796786116 | 0.001437959 |
| ENSG00000196083 | IL1RAP    | 0.841637095  | 0.001452918 |
| ENSG00000232385 | RPS3AP25  | 5.005671527  | 0.001469175 |
| ENSG00000196344 | ADH7      | 3.961766052  | 0.001478951 |
| ENSG00000074855 | ANO8      | -0.65265462  | 0.001525634 |
| ENSG00000231767 | RPS27AP5  | 3.609865418  | 0.00156887  |



|                 |             |              |             |
|-----------------|-------------|--------------|-------------|
| ENSG00000170786 | SDR16C5     | 1.344517441  | 0.001711233 |
| ENSG00000183044 | ABAT        | -0.485585083 | 0.0017634   |
| ENSG00000249092 | PPIAP77     | 4.691641365  | 0.001769923 |
| ENSG00000134668 | SPOCD1      | -1.359573419 | 0.001814703 |
| ENSG00000122644 | ARL4A       | 1.123161768  | 0.001814703 |
| ENSG00000178715 | -           | 3.325417444  | 0.00182207  |
| ENSG00000135549 | PKIB        | -0.693523525 | 0.001835685 |
| ENSG00000143878 | RHOB        | -0.650569354 | 0.001977912 |
| ENSG00000146648 | EGFR        | 0.76305769   | 0.00198893  |
| ENSG00000112655 | PTK7        | -0.632518228 | 0.002021276 |
| ENSG00000160867 | FGFR4       | -0.827727153 | 0.00204014  |
| ENSG00000184809 | B3GALT5-AS1 | -1.137284769 | 0.002097184 |
| ENSG00000121552 | CSTA        | -1.075593353 | 0.002172879 |
| ENSG00000237433 | RPSAP11     | 4.753033069  | 0.002174838 |
| ENSG00000145632 | PLK2        | -0.501831328 | 0.002209346 |
| ENSG00000228981 | -           | 3.402845934  | 0.002209346 |
| ENSG00000233830 | EIF4HP1     | 3.583713708  | 0.002296601 |
| ENSG00000185973 | TMLHE       | -0.647402841 | 0.002425823 |
| ENSG00000092758 | COL9A3      | -1.65140853  | 0.002511586 |
| ENSG00000135333 | EPHA7       | 0.945804706  | 0.002511586 |
| ENSG00000223873 | SAP18P2     | 3.909606545  | 0.002511586 |
| ENSG00000147255 | IGSF1       | 1.296410742  | 0.002537293 |
| ENSG00000146757 | ZNF92       | 0.92664326   | 0.002765914 |
| ENSG00000069667 | RORA        | 1.382603025  | 0.002958463 |
| ENSG00000247763 | TUBAP14     | 3.251048421  | 0.002958463 |
| ENSG00000239622 | -           | 3.598251135  | 0.002958463 |
| ENSG00000240051 | RPL23AP10   | 5.27111787   | 0.002958463 |
| ENSG00000095321 | CRAT        | -0.779497345 | 0.002967373 |
| ENSG00000277443 | MARCKS      | -0.591580403 | 0.00308335  |
| ENSG00000248415 | GAPDHP61    | 2.704600268  | 0.003105153 |
| ENSG00000214193 | SH3D21      | -0.5724357   | 0.00314674  |
| ENSG00000111058 | ACSS3       | 0.912031399  | 0.003302889 |
| ENSG00000249855 | EEF1A1P19   | 2.068143946  | 0.003302889 |
| ENSG00000111052 | LIN7A       | 1.18096491   | 0.003378816 |
| ENSG00000230629 | RPS23P8     | 2.045316003  | 0.003993038 |
| ENSG00000013619 | MAMLD1      | -0.965448116 | 0.004011967 |
| ENSG00000102024 | PLS3        | 2.381712125  | 0.004011967 |
| ENSG00000179083 | FAM133A     | -1.245266069 | 0.004079696 |
| ENSG00000228929 | RPS13P2     | 3.705910164  | 0.004090232 |
| ENSG00000240882 | -           | 4.42688634   | 0.004727095 |
| ENSG00000245205 | EEF1A1P4    | 2.042503359  | 0.004751799 |
| ENSG00000283041 | -           | 1.424514358  | 0.004901767 |
| ENSG00000230783 | RPS3AP13    | 3.658027714  | 0.004928121 |
| ENSG00000168843 | FSTL5       | -1.158745389 | 0.005002829 |
| ENSG00000254038 | -           | 1.554115143  | 0.005116486 |

|                 |           |              |             |
|-----------------|-----------|--------------|-------------|
| ENSG00000164850 | GPBR1     | -0.959181296 | 0.005178702 |
| ENSG00000232346 | -         | 3.551134423  | 0.005178702 |
| ENSG00000116774 | OLFML3    | -1.100370809 | 0.005186402 |
| ENSG00000228834 | ATP5MFP2  | 4.925243198  | 0.005196716 |
| ENSG00000196636 | SDHAF3    | -1.514943742 | 0.005303141 |
| ENSG00000254241 | MTCO1P47  | 4.498863591  | 0.005303141 |
| ENSG00000255450 | -         | 3.368729641  | 0.005451173 |
| ENSG00000235065 | RPL24P2   | 2.207403318  | 0.005484245 |
| ENSG00000233057 | EEF1A1P14 | 2.382147084  | 0.005599921 |
| ENSG00000213293 | -         | 3.777378219  | 0.005599921 |
| ENSG00000099954 | CECR2     | 1.329473206  | 0.005992344 |
| ENSG00000117525 | F3        | 1.470959893  | 0.005992344 |
| ENSG00000234782 | TPT1P9    | 1.940233589  | 0.00637564  |
| ENSG00000237709 | EEF1A1P28 | 2.592000439  | 0.006622458 |
| ENSG00000139239 | RPL14P1   | 2.163965933  | 0.006667098 |
| ENSG00000219932 | RPL12P8   | 4.579332181  | 0.006851717 |
| ENSG00000143995 | MEIS1     | 0.803993311  | 0.007115745 |
| ENSG00000217889 | KRT18P48  | 2.746072725  | 0.007340391 |
| ENSG00000118922 | KLF12     | 0.813612547  | 0.007397212 |
| ENSG00000128928 | IVD       | -0.502307335 | 0.007399525 |
| ENSG00000137193 | PIM1      | 0.698145337  | 0.007399525 |
| ENSG00000183346 | CABCOCO1  | 2.05425382   | 0.007399525 |
| ENSG00000240121 | RPS27P20  | 5.933269813  | 0.007399525 |
| ENSG00000154553 | PDLIM3    | 1.694268806  | 0.007428032 |
| ENSG00000103485 | QPRT      | -1.678353536 | 0.007468798 |
| ENSG00000215835 | -         | 3.324637792  | 0.007909283 |
| ENSG00000128422 | KRT17     | -2.224527163 | 0.007920521 |
| ENSG00000185607 | ACTBP7    | 3.136074151  | 0.008004505 |
| ENSG00000111339 | ART4      | 1.569154834  | 0.008200124 |
| ENSG00000240522 | RPL7AP10  | 2.067016399  | 0.008433607 |
| ENSG00000198753 | PLXNB3    | -1.041520769 | 0.008439501 |
| ENSG00000227578 | RPS3AP53  | 5.565143512  | 0.008439501 |
| ENSG00000058091 | CDK14     | 0.936951985  | 0.008668802 |
| ENSG00000226543 | MYL6P1    | 5.863341966  | 0.008838427 |
| ENSG00000119699 | TGFB3     | -0.678634827 | 0.008871155 |
| ENSG00000226243 | RPL37AP1  | 2.78872679   | 0.008883673 |
| ENSG00000101188 | NTSR1     | -0.842785383 | 0.009242164 |
| ENSG00000213750 | -         | 4.868422039  | 0.009242164 |
| ENSG00000266602 | -         | -1.7324115   | 0.009329989 |
| ENSG00000099889 | ARVCF     | -0.696148033 | 0.009329989 |
| ENSG00000240622 | RPL7P15   | 3.249642894  | 0.009329989 |
| ENSG00000170545 | SMAGP     | 0.827212584  | 0.009375689 |
| ENSG00000219507 | FTH1P8    | 1.774593631  | 0.009394364 |
| ENSG00000205978 | NYNRIN    | -0.959789906 | 0.009413676 |
| ENSG00000253341 | PCBP2P2   | 2.186444986  | 0.009413676 |

|                 |            |              |             |
|-----------------|------------|--------------|-------------|
| ENSG00000203971 | -          | 5.776230155  | 0.009413676 |
| ENSG00000099256 | PRTFDC1    | 0.795507266  | 0.009494976 |
| ENSG00000216365 | RPL37P15   | 4.920851347  | 0.009520006 |
| ENSG00000238116 | RAD21P1    | 3.831686229  | 0.010033925 |
| ENSG00000127585 | FBXL16     | -0.729623046 | 0.010242732 |
| ENSG00000179918 | SEPHS2     | -0.512902904 | 0.010377263 |
| ENSG00000107518 | ATRN1      | 0.994050619  | 0.010659626 |
| ENSG00000227121 | LINC02672  | 1.615020976  | 0.011095342 |
| ENSG00000240828 | RPL21P4    | 5.095907035  | 0.011485106 |
| ENSG00000259032 | ENSAP2     | 3.100431495  | 0.011713151 |
| ENSG00000215218 | UBE2QL1    | -1.025684813 | 0.012520138 |
| ENSG00000204287 | HLA-DRA    | -1.323224749 | 0.013111032 |
| ENSG00000187017 | ESPN       | -0.675830086 | 0.013111032 |
| ENSG00000111348 | ARHGDIB    | 1.165789744  | 0.013111032 |
| ENSG00000169253 | -          | 4.020029354  | 0.013111032 |
| ENSG00000063601 | MTMR1      | -0.470223816 | 0.01331066  |
| ENSG00000168269 | FOX11      | -1.418331634 | 0.013537674 |
| ENSG00000164292 | RHOBTB3    | 0.782931885  | 0.013644114 |
| ENSG00000147955 | SIGMAR1    | -0.916056083 | 0.014080568 |
| ENSG00000254416 | LINC02732  | -0.935101571 | 0.015055435 |
| ENSG00000173846 | PLK3       | -0.838196617 | 0.015241081 |
| ENSG00000241258 | CRCP       | 0.423543218  | 0.015241081 |
| ENSG00000076356 | PLXNA2     | 0.964900772  | 0.015241081 |
| ENSG00000139211 | AMIGO2     | 1.043845458  | 0.015346655 |
| ENSG00000107957 | SH3PXD2A   | 0.69644889   | 0.015574357 |
| ENSG00000071859 | FAM50A     | -0.63153829  | 0.01642141  |
| ENSG00000104549 | SQLE       | -0.427854588 | 0.01642141  |
| ENSG00000187122 | SLIT1      | -1.215226808 | 0.016833947 |
| ENSG00000197008 | ZNF138     | 0.597633962  | 0.017120482 |
| ENSG00000228818 | -          | 2.682027264  | 0.017120482 |
| ENSG00000106609 | TMEM248    | 0.370311854  | 0.017159749 |
| ENSG00000228247 | UBBP2      | 2.957209864  | 0.017533719 |
| ENSG00000242607 | RPS3AP34   | 6.097316364  | 0.017622727 |
| ENSG00000173852 | DPY19L1    | 0.678400585  | 0.017636161 |
| ENSG00000196437 | ZNF569     | -1.731047377 | 0.017639448 |
| ENSG00000228462 | RPS19P7    | 4.15142014   | 0.017639448 |
| ENSG00000100346 | CACNA1I    | -0.939490968 | 0.017905363 |
| ENSG00000049089 | COL9A2     | -0.716433064 | 0.017905363 |
| ENSG00000236946 | HNRNPA1P70 | 4.220827587  | 0.017905363 |
| ENSG00000269516 | CYP4F23P   | -1.355200061 | 0.018176628 |
| ENSG00000228232 | GAPDHP1    | 1.926244389  | 0.018249316 |
| ENSG00000234067 | RPL5P10    | 5.256489928  | 0.018249316 |
| ENSG00000157303 | SUSD3      | -0.785217633 | 0.01826698  |
| ENSG00000224899 | LINC02830  | 1.378909107  | 0.018290874 |
| ENSG00000127954 | STEAP4     | -1.10247217  | 0.018468408 |

|                 |           |              |             |
|-----------------|-----------|--------------|-------------|
| ENSG00000224411 | HSP90AA2P | 2.835160673  | 0.018468408 |
| ENSG00000215388 | ACTG1P3   | 3.173071442  | 0.018468408 |
| ENSG00000102312 | PORCN     | -0.650335557 | 0.018669646 |
| ENSG00000183778 | B3GALT5   | -0.983935411 | 0.018819701 |
| ENSG00000254270 | ERHP1     | 4.157242204  | 0.018819701 |
| ENSG00000259078 | PTBP1P    | 5.687193611  | 0.018819701 |
| ENSG00000197121 | PGAP1     | 1.001153218  | 0.018853073 |
| ENSG00000103197 | TSC2      | -0.522476006 | 0.01919956  |
| ENSG00000213790 | OLA1P1    | 2.498760921  | 0.01919956  |
| ENSG00000102125 | TAZ       | -0.66520731  | 0.019442471 |
| ENSG00000197774 | EME2      | -0.614885155 | 0.019442471 |
| ENSG00000184271 | POU6F1    | 1.17600574   | 0.019442471 |
| ENSG00000214460 | TPT1P6    | 2.410441562  | 0.019442471 |
| ENSG00000226549 | SCDP1     | 3.315406452  | 0.019442471 |
| ENSG00000227615 | -         | 3.403343099  | 0.019442471 |
| ENSG00000280195 | -         | -0.765248941 | 0.019539965 |
| ENSG00000227968 | BUB3P1    | 4.316965811  | 0.020335929 |
| ENSG00000127955 | GNAI1     | -1.059385072 | 0.020356509 |
| ENSG00000270706 | PRMT1P1   | 3.454672059  | 0.020449478 |
| ENSG00000231181 | -         | 2.984186863  | 0.020823463 |
| ENSG00000240535 | -         | 4.887889583  | 0.020823463 |
| ENSG00000198406 | BZW1P2    | 2.054100395  | 0.021161179 |
| ENSG00000242411 | -         | 2.791384264  | 0.021165677 |
| ENSG00000071553 | ATP6AP1   | -0.615086467 | 0.021198717 |
| ENSG00000230807 | -         | 4.185157487  | 0.021198717 |
| ENSG00000114450 | GNB4      | 1.449291301  | 0.021323853 |
| ENSG00000236480 | PKMP1     | 2.497019359  | 0.021323853 |
| ENSG00000230916 | MTCO1P53  | 1.366620002  | 0.02175371  |
| ENSG00000242327 | -         | 2.885314351  | 0.021781039 |
| ENSG00000277043 | EEF1A1P42 | 3.046001874  | 0.021865622 |
| ENSG00000234332 | BCAS2P2   | 3.019850599  | 0.021904441 |
| ENSG00000152217 | SETBP1    | 1.292835226  | 0.022309564 |
| ENSG00000228887 | EEF1DP1   | 2.1392636    | 0.022392867 |
| ENSG00000259706 | HSP90B2P  | 1.863842508  | 0.022407127 |
| ENSG00000113594 | LIFR      | 0.949861413  | 0.022720959 |
| ENSG00000005001 | PRSS22    | -0.718451213 | 0.023054112 |
| ENSG00000214078 | CPNE1     | -0.625904009 | 0.023204676 |
| ENSG00000113580 | NR3C1     | 0.733982059  | 0.023717783 |
| ENSG00000225356 | -         | 2.570596956  | 0.023792208 |
| ENSG00000183665 | TRMT12    | -0.446000179 | 0.023802567 |
| ENSG00000164236 | ANKRD33B  | 1.295901116  | 0.024034587 |
| ENSG00000213891 | RPL3P6    | 2.910977628  | 0.024034587 |
| ENSG00000223668 | EEF1A1P24 | 1.390348206  | 0.02405663  |
| ENSG00000232054 | NPM1P34   | 4.027888676  | 0.024209386 |
| ENSG00000149573 | MPZL2     | 0.624298682  | 0.024327882 |

|                 |           |              |             |
|-----------------|-----------|--------------|-------------|
| ENSG00000163513 | TGFBR2    | 0.687717999  | 0.025182507 |
| ENSG00000172974 | VDAC2P5   | 3.040203602  | 0.02557041  |
| ENSG00000059122 | FLYWCH1   | -0.535597772 | 0.026359973 |
| ENSG00000132329 | RAMP1     | -1.151709045 | 0.026496047 |
| ENSG00000124762 | CDKN1A    | -0.816297241 | 0.026867409 |
| ENSG00000230146 | SEPHS1P4  | 2.824122165  | 0.027318018 |
| ENSG00000162004 | CCDC78    | -0.609386531 | 0.027888671 |
| ENSG00000244503 | -         | 2.927566729  | 0.027888671 |
| ENSG00000213613 | RPL11P3   | 2.073794128  | 0.027954729 |
| ENSG00000162066 | AMDHD2    | -0.746617285 | 0.028088891 |
| ENSG00000263266 | RPS7P1    | 3.304406215  | 0.028088891 |
| ENSG00000146700 | SSC4D     | -1.077006632 | 0.028297426 |
| ENSG00000165905 | LARGE2    | -0.70083752  | 0.028297426 |
| ENSG00000196715 | VKORC1L1  | 0.523888854  | 0.028297426 |
| ENSG00000223529 | EEF1A1P8  | 1.565219032  | 0.028297426 |
| ENSG00000223739 | RPS15AP15 | 2.48829157   | 0.028297426 |
| ENSG00000248373 | -         | -1.915693033 | 0.028361297 |
| ENSG00000145451 | GLRA3     | 0.953610434  | 0.028377457 |
| ENSG00000165895 | ARHGAP42  | 0.763993188  | 0.028740261 |
| ENSG00000234882 | EIF3EP1   | 1.805475621  | 0.02932064  |
| ENSG00000187957 | DNER      | -1.689575438 | 0.029559212 |
| ENSG00000218582 | GAPDHP63  | 2.333091969  | 0.029736285 |
| ENSG00000233111 | RAB1C     | 2.929796171  | 0.029736285 |
| ENSG00000224773 | HSPA8P7   | 3.521345274  | 0.029736285 |
| ENSG00000250363 | KRT18P21  | 2.892056218  | 0.029934936 |
| ENSG00000233476 | EEF1A1P6  | 2.372856072  | 0.030843593 |
| ENSG00000225568 | -         | 3.690815517  | 0.031658775 |
| ENSG00000283057 | -         | 4.528258581  | 0.031999332 |
| ENSG00000100842 | EFS       | -1.330019831 | 0.032803633 |
| ENSG00000171798 | KNDC1     | -0.573539678 | 0.03305499  |
| ENSG00000213704 | EEF1A1P15 | 2.384751765  | 0.034213815 |
| ENSG00000227051 | C14orf132 | 1.229861066  | 0.034315347 |
| ENSG00000225536 | STIP1P3   | 3.815814155  | 0.034629087 |
| ENSG00000117859 | OSBPL9    | -0.437030595 | 0.035140735 |
| ENSG00000250144 | -         | 1.898506926  | 0.035140735 |
| ENSG00000262152 | LINC00514 | -0.824478928 | 0.035352576 |
| ENSG00000218175 | -         | 2.440967361  | 0.035352576 |
| ENSG00000230391 | RPSAP23   | 3.711109477  | 0.035352576 |
| ENSG00000234589 | -         | 3.606304299  | 0.035479072 |
| ENSG00000146072 | TNFRSF21  | 0.424860354  | 0.035623349 |
| ENSG00000179715 | PCED1B    | 1.022584521  | 0.035623349 |
| ENSG00000101276 | SLC52A3   | -0.682977192 | 0.036331725 |
| ENSG00000069974 | RAB27A    | 0.763178171  | 0.036331725 |
| ENSG00000231494 | RPL21P35  | 4.719297597  | 0.036435016 |
| ENSG00000170153 | RNF150    | 0.776678978  | 0.037092688 |

|                 |           |              |             |
|-----------------|-----------|--------------|-------------|
| ENSG00000135766 | EGLN1     | -0.601030685 | 0.037286484 |
| ENSG00000257616 | -         | 3.292847871  | 0.037286484 |
| ENSG00000064787 | BCAS1     | 1.968671816  | 0.037702376 |
| ENSG00000267398 | -         | 4.86359512   | 0.037870512 |
| ENSG00000197044 | ZNF441    | -2.33601766  | 0.037981597 |
| ENSG00000123472 | ATPAF1    | -0.355171675 | 0.037981597 |
| ENSG00000151846 | PABPC3    | 2.307863355  | 0.037981597 |
| ENSG00000185825 | BCAP31    | -0.597966213 | 0.038173178 |
| ENSG00000179698 | WDR97     | -0.734068206 | 0.038768233 |
| ENSG00000242683 | RPL12P21  | 4.259733953  | 0.039259136 |
| ENSG00000115129 | TP53I3    | -0.781413595 | 0.039368471 |
| ENSG00000137573 | SULF1     | 0.773326094  | 0.039368471 |
| ENSG00000223810 | KRT8P28   | 5.037443263  | 0.039391096 |
| ENSG00000184226 | PCDH9     | 0.520495288  | 0.039856514 |
| ENSG00000240480 | RPL29P2   | 2.753668271  | 0.04048991  |
| ENSG00000132746 | ALDH3B2   | -0.774910521 | 0.040972325 |
| ENSG00000167962 | ZNF598    | -0.482599097 | 0.041518364 |
| ENSG00000197043 | ANXA6     | -0.733185227 | 0.041586235 |
| ENSG00000213820 | RPL13P2   | 2.88606589   | 0.041586235 |
| ENSG00000004948 | CALCR     | 1.150273569  | 0.041707306 |
| ENSG00000242291 | RPL36AP51 | 2.544627727  | 0.041707306 |
| ENSG00000227309 | -         | 3.213063253  | 0.041707306 |
| ENSG00000251333 | RTN3P1    | 3.435185086  | 0.041707306 |
| ENSG00000243064 | ABCC13    | 5.059031564  | 0.041707306 |
| ENSG00000167768 | KRT1      | 2.738495237  | 0.041949884 |
| ENSG00000216713 | MTND4P13  | 5.327619491  | 0.041949884 |
| ENSG00000100003 | SEC14L2   | -0.800313034 | 0.042679684 |
| ENSG00000167996 | FTH1      | 0.665237636  | 0.042785064 |
| ENSG00000178028 | DMAP1     | -0.373834026 | 0.043141034 |
| ENSG00000196814 | MVB12B    | 0.665158879  | 0.043141034 |
| ENSG00000242299 | -         | 1.646650805  | 0.043141034 |
| ENSG00000224333 | GAPDHP20  | 3.544311814  | 0.043141034 |
| ENSG00000270553 | -         | 4.02133657   | 0.043141034 |
| ENSG00000220472 | -         | 3.019992559  | 0.043271716 |
| ENSG00000265480 | KRT18P55  | 3.122907463  | 0.043271716 |
| ENSG00000243547 | HNRNPKP4  | 1.841565268  | 0.043302499 |
| ENSG00000213601 | KRT18P19  | 2.467937009  | 0.04362776  |
| ENSG00000151692 | RNF144A   | 0.817176493  | 0.04378853  |
| ENSG00000117385 | P3H1      | -0.674163707 | 0.043794529 |
| ENSG00000168140 | VASN      | -0.893799166 | 0.043943537 |
| ENSG00000234785 | EEF1GP5   | 2.010451742  | 0.044073584 |
| ENSG00000260711 | -         | 1.022344849  | 0.044077435 |
| ENSG00000225971 | RPS3AP51  | 3.451834984  | 0.044077435 |
| ENSG00000102683 | SGCG      | -0.941271962 | 0.044318398 |
| ENSG00000092929 | UNC13D    | -0.552547603 | 0.045166763 |

|                 |           |              |             |
|-----------------|-----------|--------------|-------------|
| ENSG00000132561 | MATN2     | -0.459894097 | 0.046008225 |
| ENSG00000236686 | BZW1P1    | 3.134549276  | 0.046008225 |
| ENSG00000232042 | -         | 4.68501998   | 0.046226247 |
| ENSG00000232493 | RPL12P11  | 2.716425319  | 0.046356949 |
| ENSG00000167967 | E4F1      | -0.505564179 | 0.046711014 |
| ENSG00000138821 | SLC39A8   | -1.005540128 | 0.04717101  |
| ENSG00000154274 | C4orf19   | 0.537463886  | 0.04726818  |
| ENSG00000145824 | CXCL14    | -2.432576793 | 0.047492552 |
| ENSG00000108679 | LGALS3BP  | -0.575857397 | 0.047492552 |
| ENSG00000008256 | CYTH3     | 0.401236013  | 0.047492552 |
| ENSG00000232883 | -         | 2.077703722  | 0.047492552 |
| ENSG00000261557 | EEF1A1P38 | 1.817046237  | 0.047551752 |
| ENSG00000184100 | BRD7P2    | 4.445268476  | 0.047685988 |
| ENSG00000089820 | ARHGAP4   | -0.590067909 | 0.047949638 |
| ENSG00000160293 | VAV2      | -0.392153137 | 0.047949638 |
| ENSG00000226581 | LINC02848 | 2.313287097  | 0.047949638 |
| ENSG00000255642 | PABPC1P4  | 1.8582801    | 0.048064447 |
| ENSG00000258162 | -         | 2.992999721  | 0.048532021 |
| ENSG00000165731 | RET       | -0.656388536 | 0.048731744 |
| ENSG00000236937 | PTGES3P4  | 3.698104157  | 0.048731744 |
| ENSG00000268282 | -         | 3.090519817  | 0.048913995 |
| ENSG00000151572 | ANO4      | 4.560214531  | 0.048937848 |
| ENSG00000254387 | MYL12AP1  | 4.626925986  | 0.04906469  |
| ENSG00000181085 | MAPK15    | -0.682094944 | 0.049123345 |
| ENSG00000173917 | HOXB2     | 0.954410081  | 0.049346147 |
| ENSG00000141527 | CARD14    | -0.521667592 | 0.049377932 |
| ENSG00000163017 | ACTG2     | -1.044928379 | 0.049958593 |
| ENSG00000090674 | MCOLN1    | -0.602387236 | 0.049958593 |
| ENSG00000115594 | IL1R1     | 0.895353232  | 0.049958593 |
| ENSG00000232187 | FTH1P7    | 1.874467012  | 0.049958593 |
| ENSG00000243094 | RPL32P2   | 2.443087852  | 0.049958593 |

**Supplementary table S2.** List of all altered genes for the hypoxia dataset.

| Ensembl_ID      | GeneName | log2FoldChange | padj     |
|-----------------|----------|----------------|----------|
| ENSG00000115221 | ITGB6    | 1.887537323    | 1.17E-22 |
| ENSG00000003436 | TFPI     | 2.172972248    | 6.06E-17 |
| ENSG00000146674 | IGFBP3   | 1.773300934    | 5.30E-13 |
| ENSG00000165025 | SYK      | 1.163683373    | 5.66E-13 |
| ENSG00000154229 | PRKCA    | 1.163129691    | 2.21E-10 |
| ENSG00000164683 | HEY1     | 1.481845222    | 6.36E-10 |
| ENSG00000172575 | RASGRP1  | 1.265181902    | 8.15E-10 |
| ENSG00000169851 | PCDH7    | -1.647079526   | 8.38E-10 |
| ENSG00000085276 | MECOM    | 1.51082496     | 2.20E-08 |

|                 |           |              |             |
|-----------------|-----------|--------------|-------------|
| ENSG00000136859 | ANGPTL2   | 8.129998244  | 3.77E-08    |
| ENSG00000164749 | HNF4G     | 2.636267727  | 3.91E-08    |
| ENSG00000196083 | IL1RAP    | 1.197383809  | 5.39E-08    |
| ENSG00000142609 | CFAP74    | 1.399515499  | 5.67E-08    |
| ENSG00000146072 | TNFRSF21  | 0.774901922  | 7.61E-08    |
| ENSG00000116729 | WLS       | 2.827810124  | 7.61E-08    |
| ENSG00000154783 | FGD5      | 1.965559587  | 1.06E-07    |
| ENSG00000111799 | COL12A1   | -1.540203088 | 1.13E-07    |
| ENSG00000186583 | SPATC1    | -1.931076585 | 1.41E-07    |
| ENSG00000047634 | SCML1     | 1.65194411   | 1.28E-06    |
| ENSG00000146648 | EGFR      | 0.948714015  | 1.55E-06    |
| ENSG00000144824 | PHLDB2    | 1.727146526  | 1.61E-06    |
| ENSG00000164292 | RHOBTB3   | 1.207442733  | 4.87E-06    |
| ENSG00000198918 | RPL39     | 1.450868842  | 4.87E-06    |
| ENSG00000012779 | ALOX5     | 1.597723393  | 1.13E-05    |
| ENSG00000058085 | LAMC2     | 0.806616786  | 1.14E-05    |
| ENSG00000121552 | CSTA      | -1.416173976 | 1.34E-05    |
| ENSG00000006747 | SCIN      | 1.420886012  | 1.34E-05    |
| ENSG00000231298 | MANCR     | 2.51434657   | 1.80E-05    |
| ENSG00000183696 | UPP1      | 1.58692632   | 2.45E-05    |
| ENSG00000182795 | C1orf116  | 1.600709084  | 4.38E-05    |
| ENSG00000115919 | KYNU      | -1.042762853 | 4.89E-05    |
| ENSG00000107159 | CA9       | -1.421993728 | 4.93E-05    |
| ENSG00000169071 | ROR2      | 1.417465636  | 4.93E-05    |
| ENSG00000135111 | TBX3      | 1.598241824  | 4.93E-05    |
| ENSG00000064042 | LIMCH1    | 1.267690171  | 5.04E-05    |
| ENSG00000152137 | HSPB8     | -1.134438072 | 5.14E-05    |
| ENSG00000178726 | THBD      | 1.626756766  | 5.14E-05    |
| ENSG00000107263 | RAPGEF1   | 0.671545037  | 5.76E-05    |
| ENSG00000285969 | -         | 2.097187313  | 5.76E-05    |
| ENSG00000286322 | -         | 6.518467235  | 6.50E-05    |
| ENSG00000163513 | TGFBR2    | 1.007679091  | 6.65E-05    |
| ENSG00000140465 | CYP1A1    | -1.56107289  | 9.77E-05    |
| ENSG00000076641 | PAG1      | 1.563945474  | 0.000111832 |
| ENSG00000235123 | DSCAM-AS1 | -0.790080967 | 0.000113593 |
| ENSG00000057657 | PRDM1     | 2.329038489  | 0.000145353 |
| ENSG00000204054 | LINC00963 | 0.783798549  | 0.000179915 |
| ENSG00000204791 | SMPD5     | -1.633123343 | 0.000188298 |
| ENSG00000111052 | LIN7A     | 1.33683013   | 0.000188298 |
| ENSG00000170689 | HOXB9     | 1.905768603  | 0.000197864 |
| ENSG00000124225 | PMEPA1    | 0.850369061  | 0.000206504 |
| ENSG00000205426 | KRT81     | -1.316479878 | 0.00021194  |
| ENSG00000046604 | DSG2      | 0.787711198  | 0.000225622 |
| ENSG00000113532 | ST8SIA4   | -1.050562365 | 0.000264609 |
| ENSG00000074527 | NTN4      | 1.006042339  | 0.000264609 |



|                 |           |              |             |
|-----------------|-----------|--------------|-------------|
| ENSG00000080031 | PTPRH     | 1.042134877  | 0.000281654 |
| ENSG00000266602 | -         | -2.018787766 | 0.00028389  |
| ENSG00000168843 | FSTL5     | -1.800256286 | 0.000357038 |
| ENSG00000019549 | SNAI2     | 1.698272988  | 0.000362594 |
| ENSG00000187122 | SLIT1     | -1.620709612 | 0.000375597 |
| ENSG00000167925 | GHDC      | -1.333917599 | 0.000395162 |
| ENSG00000138386 | NAB1      | 1.082406341  | 0.000442487 |
| ENSG00000101188 | NTSR1     | -1.042061506 | 0.000550814 |
| ENSG00000128052 | KDR       | 1.534894225  | 0.000623533 |
| ENSG00000138640 | FAM13A    | 1.182037366  | 0.000662563 |
| ENSG00000198363 | ASPH      | 0.979805823  | 0.0007227   |
| ENSG00000108018 | SORCS1    | -1.489535649 | 0.00077885  |
| ENSG00000147010 | SH3KBP1   | 0.572321065  | 0.00077885  |
| ENSG00000091136 | LAMB1     | 1.191092795  | 0.000899757 |
| ENSG00000254038 | -         | 3.003212661  | 0.001010642 |
| ENSG00000173930 | SLCO4C1   | -1.288079259 | 0.001082896 |
| ENSG00000221923 | ZNF880    | 1.335263788  | 0.001082896 |
| ENSG00000168542 | COL3A1    | 1.602811449  | 0.001679115 |
| ENSG00000106031 | HOXA13    | 1.016363848  | 0.001943552 |
| ENSG00000137193 | PIM1      | 0.769454184  | 0.001981872 |
| ENSG00000053747 | LAMA3     | 0.907185051  | 0.001981872 |
| ENSG00000105559 | PLEKHA4   | -1.466672125 | 0.00198545  |
| ENSG00000116285 | ERRFI1    | 0.685058114  | 0.002008162 |
| ENSG00000205413 | SAMD9     | 1.418108679  | 0.002008162 |
| ENSG00000080200 | CRYBG3    | 1.682785382  | 0.002071108 |
| ENSG00000249267 | LINC00939 | -3.075744737 | 0.002190921 |
| ENSG00000166949 | SMAD3     | 0.584936666  | 0.002190921 |
| ENSG00000145819 | ARHGAP26  | 0.739434387  | 0.002190921 |
| ENSG00000106609 | TMEM248   | 0.440441705  | 0.002273963 |
| ENSG00000113594 | LIFR      | 1.206832965  | 0.002273963 |
| ENSG00000167767 | KRT80     | 0.649454647  | 0.002723742 |
| ENSG00000156103 | MMP16     | -1.525939945 | 0.002925458 |
| ENSG00000176903 | PNMA1     | 0.501869333  | 0.002925458 |
| ENSG00000258676 | -         | 1.54566665   | 0.002925458 |
| ENSG00000106258 | CYP3A5    | 1.55131228   | 0.002925458 |
| ENSG00000260604 | -         | 1.204819417  | 0.003056491 |
| ENSG00000224897 | POT1-AS1  | 1.22132436   | 0.003094074 |
| ENSG00000127329 | PTPRB     | 1.921897774  | 0.003094074 |
| ENSG00000130700 | GATA5     | 5.496109822  | 0.003113568 |
| ENSG00000162004 | CCDC78    | -0.773688636 | 0.003140284 |
| ENSG00000115935 | WIPF1     | 1.458618106  | 0.003261989 |
| ENSG00000168280 | KIF5C     | -1.028103024 | 0.003296233 |
| ENSG00000140479 | PCSK6     | 0.669343311  | 0.00333866  |
| ENSG00000086548 | CEACAM6   | 1.109644795  | 0.003627968 |
| ENSG00000145623 | OSMR      | 0.716953336  | 0.0040397   |

|                 |           |              |             |
|-----------------|-----------|--------------|-------------|
| ENSG00000197261 | C6orf141  | -1.012853368 | 0.004144454 |
| ENSG00000156535 | CD109     | 0.848080826  | 0.004144454 |
| ENSG00000118523 | CCN2      | 1.482978194  | 0.004161113 |
| ENSG00000112655 | PTK7      | -0.629473806 | 0.00420601  |
| ENSG00000100346 | CACNA1I   | -0.963970906 | 0.004270001 |
| ENSG00000151632 | AKR1C2    | -1.016893989 | 0.004483458 |
| ENSG00000150961 | SEC24D    | 0.545709369  | 0.005477395 |
| ENSG00000227121 | LINC02672 | 0.909713024  | 0.005531037 |
| ENSG00000164120 | HPGD      | 1.771775904  | 0.005531037 |
| ENSG00000171827 | ZNF570    | -1.077090746 | 0.005565237 |
| ENSG00000120708 | TGFB1     | 0.695960814  | 0.005565237 |
| ENSG00000198189 | HSD17B11  | 1.246374525  | 0.005565237 |
| ENSG00000145779 | TNFAIP8   | 0.746490847  | 0.005749465 |
| ENSG00000168874 | ATOH8     | 0.848818574  | 0.005901578 |
| ENSG00000174473 | GALNTL6   | -1.001236023 | 0.005902948 |
| ENSG00000266074 | BAHCC1    | -0.64739927  | 0.005919479 |
| ENSG00000204740 | MALRD1    | -1.200847317 | 0.005925588 |
| ENSG00000092969 | TGFB2     | 1.190774446  | 0.005937038 |
| ENSG00000180185 | FAHD1     | -0.553978655 | 0.006076574 |
| ENSG00000106635 | BCL7B     | 0.658565814  | 0.006180558 |
| ENSG00000183049 | CAMK1D    | 0.740456408  | 0.006628651 |
| ENSG00000076356 | PLXNA2    | 1.060161503  | 0.007071145 |
| ENSG00000116016 | EPAS1     | 0.710660721  | 0.007310133 |
| ENSG00000177707 | NECTIN3   | 0.928397449  | 0.008001667 |
| ENSG00000164236 | ANKRD33B  | 1.298113022  | 0.008438208 |
| ENSG00000159840 | ZYX       | 0.59033282   | 0.008713077 |
| ENSG00000196814 | MVB12B    | 0.82873454   | 0.008713077 |
| ENSG00000185442 | FAM174B   | 0.654451371  | 0.009151961 |
| ENSG00000152270 | PDE3B     | 0.715891537  | 0.00947575  |
| ENSG00000069667 | RORA      | 1.162401449  | 0.009672809 |
| ENSG00000105137 | SYDE1     | 0.649403117  | 0.009693199 |
| ENSG00000286523 | -         | -2.077053571 | 0.009696514 |
| ENSG00000181104 | F2R       | 1.173707777  | 0.009853825 |
| ENSG00000103485 | QPRT      | -1.653053249 | 0.009875314 |
| ENSG00000198948 | MFAP3L    | -1.016024851 | 0.009875314 |
| ENSG00000069020 | MAST4     | 0.736737671  | 0.010420293 |
| ENSG00000185736 | ADARB2    | 2.422037065  | 0.010472457 |
| ENSG00000139793 | MBNL2     | 0.666241554  | 0.010781585 |
| ENSG00000082684 | SEMA5B    | 1.027668116  | 0.010781585 |
| ENSG00000224899 | LINC02830 | 1.527838579  | 0.010781585 |
| ENSG00000116774 | OLFML3    | -1.304608755 | 0.010805549 |
| ENSG00000147955 | SIGMAR1   | -1.157881403 | 0.010805549 |
| ENSG00000180938 | ZNF572    | -0.619719575 | 0.011983847 |
| ENSG00000076716 | GPC4      | 0.918676078  | 0.011983847 |
| ENSG00000150907 | FOXO1     | 0.752117822  | 0.012268421 |

|                 |           |              |             |
|-----------------|-----------|--------------|-------------|
| ENSG00000164850 | GPBR1     | -0.96672716  | 0.012499516 |
| ENSG00000214293 | APTR      | 0.66005604   | 0.012852333 |
| ENSG00000157404 | KIT       | -1.328505763 | 0.012897939 |
| ENSG00000141527 | CARD14    | -0.598080812 | 0.012995421 |
| ENSG00000171617 | ENC1      | 0.563968494  | 0.012995421 |
| ENSG00000144290 | SLC4A10   | -1.159528989 | 0.013028973 |
| ENSG00000145451 | GLRA3     | 1.055015513  | 0.013028973 |
| ENSG00000237187 | NR2F1-AS1 | 3.764906575  | 0.014042161 |
| ENSG00000090661 | CERS4     | -0.758894532 | 0.014576441 |
| ENSG00000101986 | ABCD1     | -0.759319392 | 0.01484599  |
| ENSG00000003096 | KLHL13    | 1.071467939  | 0.01484599  |
| ENSG00000197696 | NMB       | 1.008653941  | 0.015601172 |
| ENSG00000083720 | OXCT1     | -0.816172872 | 0.015972041 |
| ENSG00000214193 | SH3D21    | -0.504225322 | 0.015972041 |
| ENSG00000161642 | ZNF385A   | -0.473793931 | 0.015972041 |
| ENSG00000020181 | ADGRA2    | 1.462585829  | 0.015972041 |
| ENSG00000153993 | SEMA3D    | 2.385145542  | 0.015972041 |
| ENSG00000159167 | STC1      | -0.742604055 | 0.01603399  |
| ENSG00000128039 | SRD5A3    | 0.777479384  | 0.016155137 |
| ENSG00000082781 | ITGB5     | 0.741839788  | 0.016451458 |
| ENSG00000102699 | PARP4     | 0.576630835  | 0.016743787 |
| ENSG00000188959 | C9orf152  | -1.372582578 | 0.017195686 |
| ENSG00000168679 | SLC16A4   | -1.372917814 | 0.017261245 |
| ENSG00000151718 | WWC2      | 0.738561796  | 0.017261245 |
| ENSG00000136238 | RAC1      | 0.575233958  | 0.017618152 |
| ENSG00000091409 | ITGA6     | 1.16162003   | 0.017817829 |
| ENSG00000185924 | RTN4RL1   | -0.553046234 | 0.018107152 |
| ENSG00000257671 | KRT7-AS   | 1.165481696  | 0.01907405  |
| ENSG00000134504 | KCTD1     | 0.624744539  | 0.019107605 |
| ENSG00000127955 | GNAI1     | -1.027798495 | 0.019242308 |
| ENSG00000112183 | RBM24     | -0.990531229 | 0.019242308 |
| ENSG00000095321 | CRAT      | -0.865522502 | 0.019242308 |
| ENSG00000128274 | A4GALT    | -0.829521154 | 0.019828877 |
| ENSG00000196636 | SDHAF3    | -1.397373821 | 0.020109986 |
| ENSG00000172794 | RAB37     | -0.977071402 | 0.020109986 |
| ENSG00000214078 | CPNE1     | -0.656533189 | 0.020109986 |
| ENSG00000166833 | NAV2      | 1.535642143  | 0.020119476 |
| ENSG00000253276 | CCDC71L   | 0.563147043  | 0.020319347 |
| ENSG00000131746 | TNS4      | -1.171019047 | 0.020401967 |
| ENSG00000198246 | SLC29A3   | 0.598720205  | 0.020600083 |
| ENSG00000172551 | MUCL1     | -0.924446266 | 0.022069823 |
| ENSG00000139289 | PHLDA1    | 0.748078573  | 0.022069823 |
| ENSG00000162496 | DHRS3     | 1.124026074  | 0.022069823 |
| ENSG00000115290 | GRB14     | -0.591415986 | 0.022820118 |
| ENSG00000230882 | -         | 1.058086599  | 0.022820118 |

|                 |            |              |             |
|-----------------|------------|--------------|-------------|
| ENSG00000249700 | SRD5A3-AS1 | 0.999653999  | 0.023737661 |
| ENSG00000164932 | CTHRC1     | -1.184322986 | 0.025845308 |
| ENSG00000106617 | PRKAG2     | 0.63438887   | 0.026066954 |
| ENSG00000117525 | F3         | 1.150824104  | 0.026129253 |
| ENSG00000106638 | TBL2       | 0.540525634  | 0.026634815 |
| ENSG00000127948 | POR        | 0.628814201  | 0.028129504 |
| ENSG00000136383 | ALPK3      | 0.946763384  | 0.028129504 |
| ENSG00000166974 | MAPRE2     | 1.020963791  | 0.028129504 |
| ENSG00000196428 | TSC22D2    | 0.570377694  | 0.028296915 |
| ENSG00000232533 | -          | 0.871876528  | 0.028296915 |
| ENSG00000144366 | GULP1      | 0.872570518  | 0.02856424  |
| ENSG00000149573 | MPZL2      | 0.616046997  | 0.02874668  |
| ENSG00000079805 | DNM2       | 0.50576267   | 0.029296616 |
| ENSG00000058091 | CDK14      | 0.863235517  | 0.029529631 |
| ENSG00000111058 | ACSS3      | 0.877215967  | 0.029529631 |
| ENSG00000153904 | DDAH1      | -0.750222768 | 0.029722896 |
| ENSG00000105877 | DNAH11     | 1.069564245  | 0.03040863  |
| ENSG00000139352 | ASCL1      | -1.227245488 | 0.030814065 |
| ENSG00000186187 | ZNRF1      | 0.518411577  | 0.030894038 |
| ENSG00000071859 | FAM50A     | -0.607014788 | 0.031228581 |
| ENSG00000079257 | LXN        | 0.619899203  | 0.031929235 |
| ENSG00000123095 | BHLHE41    | 0.828581841  | 0.033039427 |
| ENSG00000145824 | CXCL14     | -4.897880799 | 0.033334657 |
| ENSG00000117868 | ESYT2      | 0.415393014  | 0.033334657 |
| ENSG00000232931 | LINC00342  | 1.023885812  | 0.033334657 |
| ENSG00000143878 | RHOB       | -0.526929328 | 0.03444086  |
| ENSG00000283538 | -          | 1.063049627  | 0.034882785 |
| ENSG00000258667 | HIF1A-AS3  | 0.937183134  | 0.034945109 |
| ENSG00000230221 | -          | 3.954877082  | 0.034999533 |
| ENSG00000154274 | C4orf19    | 0.568342414  | 0.037211785 |
| ENSG00000164266 | SPINK1     | 2.19454636   | 0.037527932 |
| ENSG00000185033 | SEMA4B     | 0.573268786  | 0.037692183 |
| ENSG00000136830 | NIBAN2     | 0.610188212  | 0.037692183 |
| ENSG00000085831 | TTC39A     | -0.494439943 | 0.039322054 |
| ENSG00000241258 | CRCP       | 0.406772042  | 0.039396988 |
| ENSG00000163364 | LINC01116  | 0.801399256  | 0.039396988 |
| ENSG00000178821 | TMEM52     | 0.803856407  | 0.039396988 |
| ENSG00000127129 | EDN2       | 0.879138707  | 0.039396988 |
| ENSG00000189212 | DPY19L2P1  | 1.729940482  | 0.039396988 |
| ENSG00000085741 | WNT11      | 1.758298528  | 0.039396988 |
| ENSG00000168269 | FOXI1      | -1.251919043 | 0.03986553  |
| ENSG00000121671 | CRY2       | -0.552356356 | 0.03986553  |
| ENSG00000149929 | HIRIP3     | -0.526245111 | 0.03986553  |
| ENSG00000105711 | SCN1B      | 0.641812557  | 0.03986553  |
| ENSG00000177283 | FZD8       | 0.812610501  | 0.040268156 |

|                 |           |              |             |
|-----------------|-----------|--------------|-------------|
| ENSG00000035664 | DAPK2     | 0.407928743  | 0.041586398 |
| ENSG00000132535 | DLG4      | -1.299819499 | 0.041646165 |
| ENSG00000181588 | MEX3D     | 0.670043208  | 0.041865833 |
| ENSG00000146151 | HMGCLL1   | -1.144578957 | 0.042257282 |
| ENSG00000100842 | EFS       | -1.633628557 | 0.043628975 |
| ENSG00000179083 | FAM133A   | -1.014674402 | 0.043628975 |
| ENSG00000142871 | CCN1      | 0.561051523  | 0.043628975 |
| ENSG00000146757 | ZNF92     | 0.752250317  | 0.043628975 |
| ENSG00000087053 | MTMR2     | 0.901623924  | 0.043831175 |
| ENSG00000151655 | ITIH2     | -1.536930979 | 0.044104959 |
| ENSG00000156463 | SH3RF2    | 0.767569119  | 0.044104959 |
| ENSG00000008311 | AASS      | 2.265648385  | 0.044348026 |
| ENSG00000123836 | PFKFB2    | 0.608542308  | 0.044884674 |
| ENSG00000260401 | -         | 0.768734559  | 0.045235838 |
| ENSG00000181085 | MAPK15    | -0.725214109 | 0.04634039  |
| ENSG00000086619 | ERO1B     | 0.835003061  | 0.046831615 |
| ENSG00000136828 | RALGPS1   | 0.58962825   | 0.046972194 |
| ENSG00000006576 | PHTF2     | 0.584285468  | 0.047111228 |
| ENSG00000203971 | -         | 4.945148389  | 0.047615473 |
| ENSG00000071575 | TRIB2     | 0.812972534  | 0.047985894 |
| ENSG00000185973 | TMLHE     | -0.534667382 | 0.048110254 |
| ENSG00000157502 | PWWP3B    | -1.519630917 | 0.048310049 |
| ENSG00000259527 | LINC00052 | -2.729850582 | 0.048942107 |
| ENSG00000182985 | CADM1     | 0.705305357  | 0.048942107 |
| ENSG00000149591 | TAGLN     | 0.832459222  | 0.048942107 |
| ENSG00000115602 | IL1RL1    | 1.750644752  | 0.049525138 |
| ENSG00000186197 | EDARADD   | 1.300889719  | 0.049677344 |

**Supplementary table S3.** Sequences of sgRNA used for CRISPR/Cas9 as well as primers used for real time PCR

| Gene             | Primer Pair                                                                                 |
|------------------|---------------------------------------------------------------------------------------------|
| sgRNA1(Cas9wt)   | F: 5'- <b>CACCg</b> GGACGAGATGAAGGCGTCTG-3'<br>R: 5'- <b>AAAC</b> CAGACGCCTTCATCTCGTCCc-3'  |
| sgRNA2.1 (Cas9n) | F: 5'- <b>CACCg</b> TCATCTCGTCCTCTGACTTC-3'<br>R: 5'- <b>AAAC</b> GAAAGTCAGAGGACGAGATGAc-3' |
| sgRNA2.2 (Cas9n) | F: 5'- <b>CACCg</b> TGCCACCGTGCTCACC GCCC-3'<br>R: 5'- <b>AAAC</b> GGGCGGTGAGCACGGTGGCAc-3' |
| genomic MB       | F: 5'-TGGGAAGACAGGGAGCTAAA-3'<br>R: 5'-GCTCTGCCATTATCCACCTC-3'                              |
| TWIST            | F: 5'-GGAGTCCGCACTTTACGAG-3'<br>R: 5'-TCTGGAGGACCTGGTAGAGG-3'                               |
| SNAIL            | F: 5'-GACCACTATGCCGCGCTCTT-3'<br>R: 5'-TCGCTGTAGTTAGGCTTCCGATT-3'                           |
| SLUG             | F: 5'-TTCGGACCCACACATTACCT-3'<br>R: 5'-GCAGTGAGGGCAAGAAAAAG-3'                              |
| FN1              | F: 5'-TCGCCATCAGTAGAAGGTAGCA-3'<br>R: 5'-TACTTTCTTGATTTTCTTCCACAGCATA-3'                    |

|         |                                                                               |
|---------|-------------------------------------------------------------------------------|
| ZEB1    | F: 5'-TACAGAACCCAACTTGAACGTCACA-3'<br>R: 5'-GATTACACCCAGACTGCGTCACA-3'        |
| MMP3    | F: 5'-CAACAAGAGCTAAGTAAAGCCAGTGG-3'<br>R: 5'-CTAGATATTTCTGAACAAGGTTTCATGCT-3' |
| PI3K CA | F: 5'-AGTAGGCAACCGTGAAGAAAAG-3'<br>R: 5'-GAGGTGAATTGAGGTCCCTAAGA-3'           |
| PI3K CB | F: 5'-CTGCCTGCGACAGATGAGTG-3'<br>R: 5'-TCCGATTACCAAGTGCTCTTTC-3'              |
| FASN    | F: 5'-CATCCAGATAGGCCTCATAGAC-3'<br>R: 5'-CTCCATGAAGTAGGAGTGGAAG-3'            |
| EGLN1   | F: 5'-CAAATGGAGATGGAAGATGTGTG-3'<br>R: 5'-AATGTCAGCAAACCTGGGCTTT-3'           |
| EPO     | F: 5'-ATGTGGATAAAGCCGTCAGT-3'<br>R: 5'-AGTGATTGTTCCGAGTGGAG-3'                |
| CITED2  | F: 5'-ACCATCACCCCTGCCCCACC-3'<br>R: 5'-CGTAGTGTATGTGCTCGCCCA-3'               |
| SOD1    | F: 5'-TACAAAGACAGGAAACGCTGG-3'<br>R: 5'-CCTCAGACTACATCCAAGGGAA-3'             |
| SOD2    | F: 5'-AGGTGACTCTAACTTCCCTGGC-3'<br>R: 5'-CCCACAAGCACAGAAATAAAGGAGA-3'         |
| SOD3    | F: 5'-CGTTCCTGGGCTGGCTGGGT-3'<br>R: 5'-ATGGCTGGAGTCGGGCACCTTT-3'              |
| GPX3    | F: 5'-AGGTATGCGTGATTGTGTGTGT-3'<br>R: 5'-GGAGAACTGGAGAGAAAGGGTTG-3'           |
| GPX4    | F: 5'-CGCTGTGGAAGTGGATGAAGA-3'<br>R: 5'-CTTGTCGATGAGGAACTTGGTGAA-3'           |
| CAT     | F: 5'-GACATTACCAAATACTCCAAGGCAA-3'<br>R: 5'-AACCCGATTCTCCAGCAACA-3'           |
| ACTB    | F: 5'-CTGGAACGGTGAAGGTGACA-3'<br>R: 5'-AAGGGACTTCCTGTAACAACGA-3'              |
